# Supplementary material for: Photoenhanced interfacial electron transfer of a dual functional hematite biophotoelectrode
Source: Royal Society of Chemistry journal article supplement (doi:10.1039/d3tc02294c), 2023-01-01
Supplement: d3tc02294c1.pdf [file d3tc02294c1.pdf]

## Supporting Information

### **Photoenhanced Interfacial Electron Transfer of Dual Functional Hematite Biophotocathode**

Chun Hong Mak<sup>a,b</sup>, Yong Peng<sup>a,b</sup>, Man Hin Chong<sup>a,b</sup>, Li Yu<sup>a,b,c</sup>, Minshu Du<sup>d</sup>, Li Ji<sup>e</sup>, Xingli Zou<sup>f</sup>, Guizheng Zou<sup>g</sup>, Hsin-Hui Shen<sup>\*h</sup>, Shella Permatasari Santoso<sup>\*i</sup>, Wenxin Niu<sup>j</sup>, Fang-Fang Li<sup>k</sup>, and Hsien-Yi Hsu<sup>\*,a,b</sup>

a. School of Energy and Environment & Department of Materials Science and Engineering & Centre for Functional Photonics (CFP), City University of Hong Kong, Kowloon Tong, Hong Kong, China.

b. Shenzhen Research Institute of City University of Hong Kong, Shenzhen, 518057, China.

c. Key Laboratory for Water Quality and Conservation of the Pearl River Delta, Ministry of Education, Institute of Environmental Research at Greater Bay, Guangzhou University, Guangzhou 510006, China

d. School of Materials Science and Engineering, Northwestern Polytechnical University, Xi'an, Shaanxi 710072, China

e. State Key Laboratory of ASIC and System, School of Microelectronics, Fudan University, Shanghai 200433, China.

f. State Key Laboratory of Advanced Special Steel, School of Materials Science and Engineering, Shanghai University, Shanghai 200072, P. R. China.

g. School of Chemistry and Chemical Engineering, Shandong University, Jinan, 250100, China.

h. Department of Materials Science and Engineering, Faculty of Engineering, Monash University, Clayton, Victoria 3800, Australia

i. Department of Chemical Engineering, Faculty of Engineering, Widya Mandala Surabaya Catholic University, Kalijudan No. 37, Surabaya 60114, East Java, Indonesia;

j. State Key Laboratory of Electroanalytical Chemistry, Changchun Institute of Applied Chemistry, Chinese Academy of Sciences 5625 Renmin Street, Changchun, Jilin 130022, P. R. China

k. School of Materials Science and Engineering, Huazhong University of Science and Technology, 1037 Luoyu Road, Wuhan 430074, China

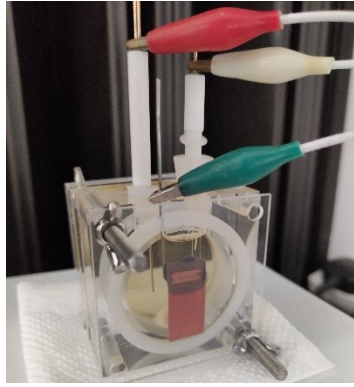

**Fig. S1.** Assembled S-MPEC chambers  $\text{Fe}_2\text{O}_3$  as the working electrode.

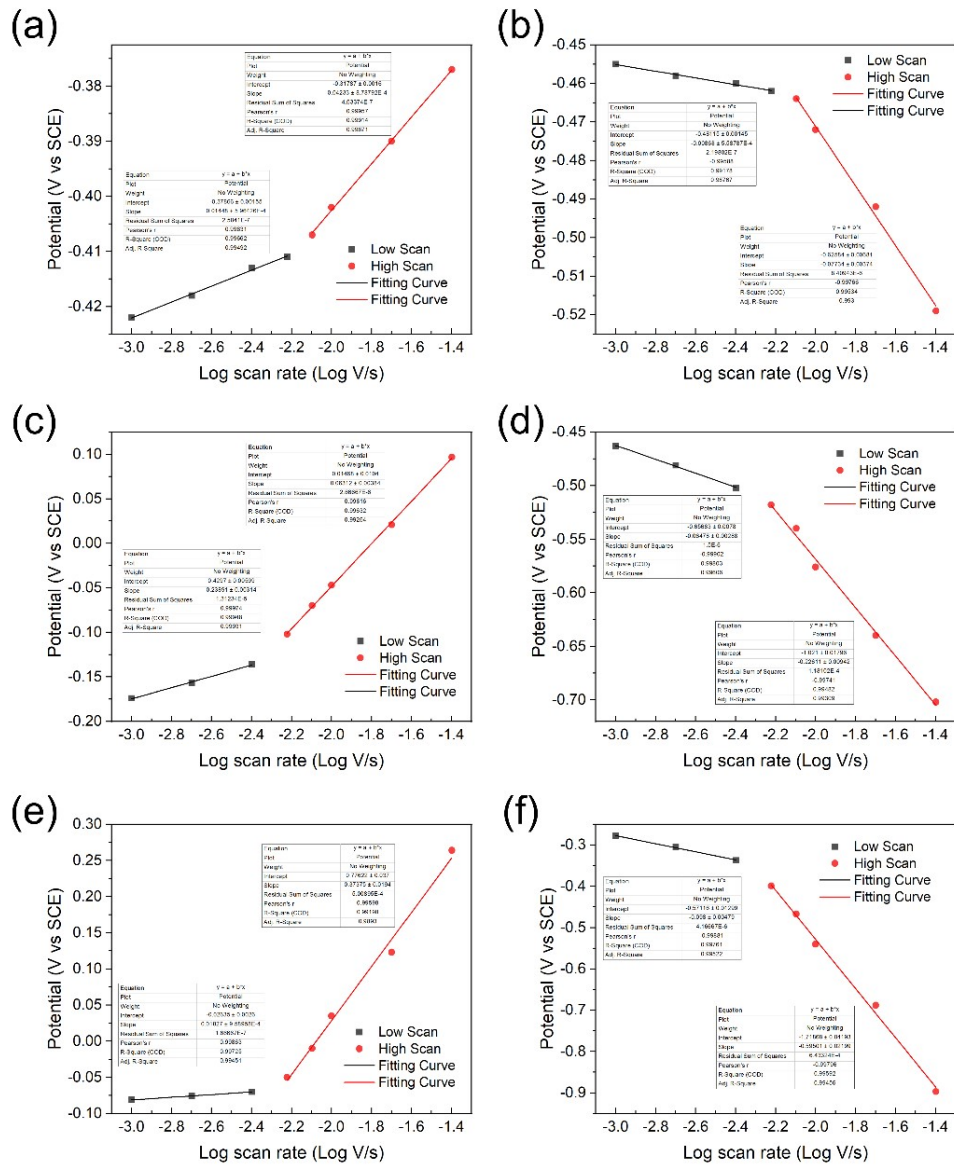

**Fig. S2.** The plot of  $E_p$  against the log of scan rate at low and high scan rates of oxidation reaction using (a) CC-MR-1, (c)  $\text{Fe}_2\text{O}_3$  and (e)  $\text{Fe}_2\text{O}_3$ -MR-1, as well as reduction reaction using (b) CC-MR-1, (d)  $\text{Fe}_2\text{O}_3$  and (f)  $\text{Fe}_2\text{O}_3$ -MR-1 to determine of critical scan rate ( $V_c$ ).

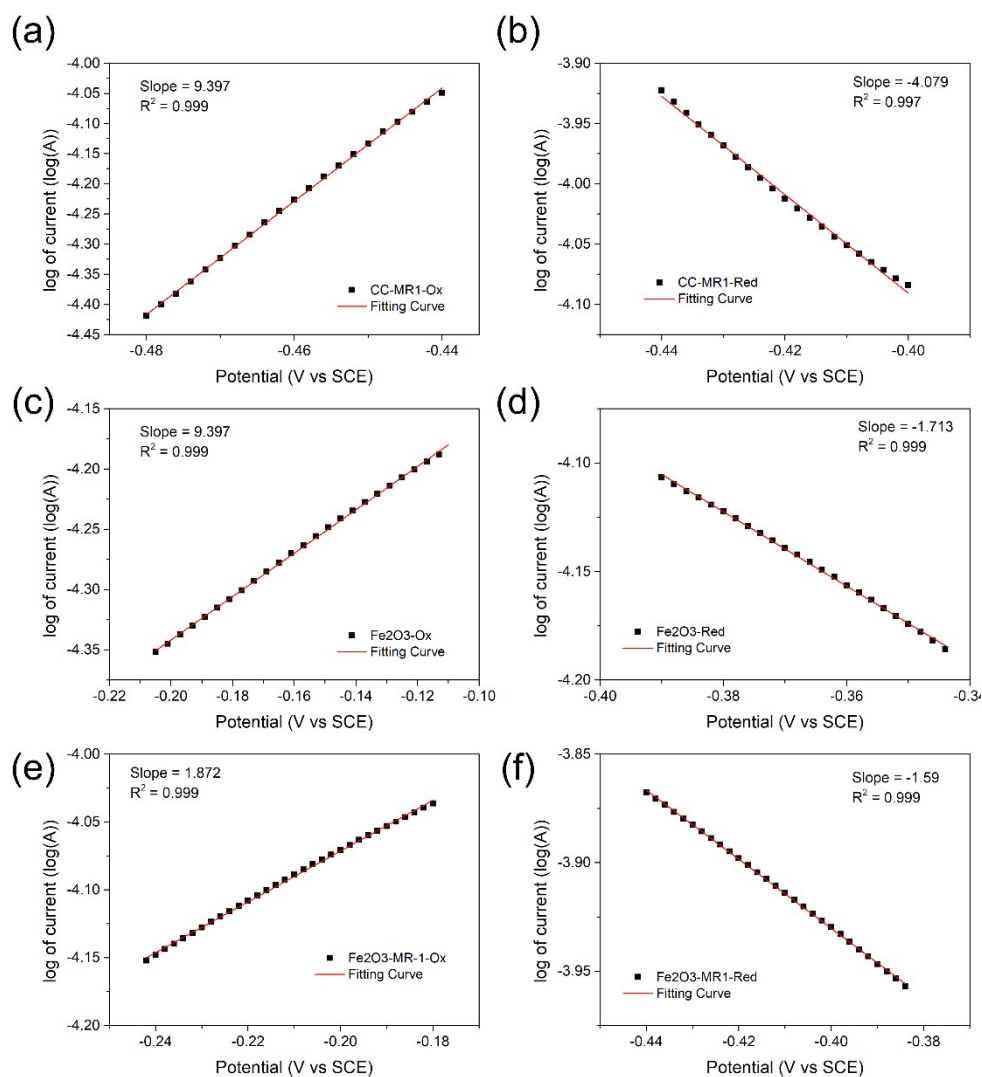

**Fig. S3.** Tafel plot of the oxidation peak of (a) CC-MR-1, (c)  $\text{Fe}_2\text{O}_3$  and (e)  $\text{Fe}_2\text{O}_3$ -MR-1 and the reduction peak of (b) CC-MR-1, (d)  $\text{Fe}_2\text{O}_3$  and (f)  $\text{Fe}_2\text{O}_3$ -MR-1.

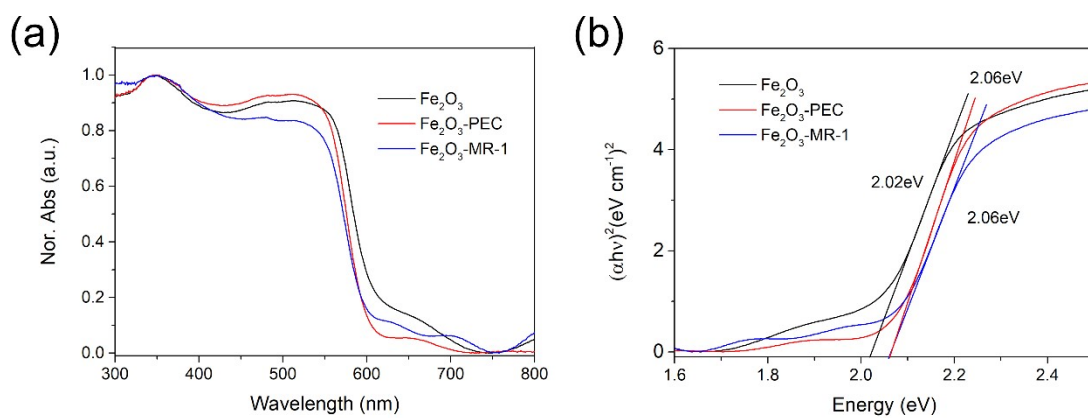

**Fig. S4.** (a) UV-Vis diffuse reflectance spectrum and (b) Tauc plot of  $\text{Fe}_2\text{O}_3$ ,  $\text{Fe}_2\text{O}_3$  after PEC measurement, and  $\text{Fe}_2\text{O}_3$ -MR-1.

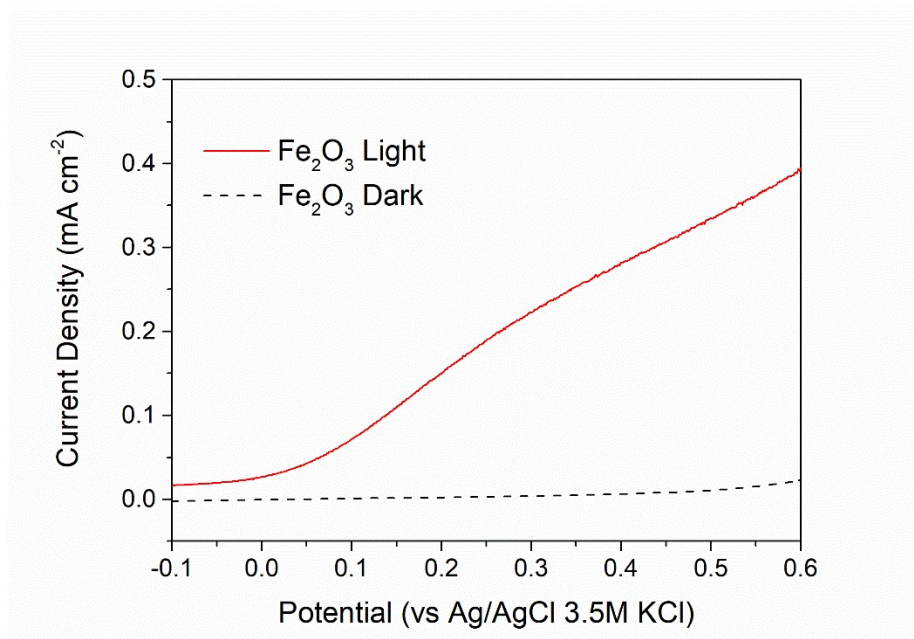

**Fig. S5.** Linear sweep voltammetry curve of the  $\text{Fe}_2\text{O}_3$  photoanodes in 1M NaOH under  $100 \text{ mW cm}^{-2}$  irradiation.

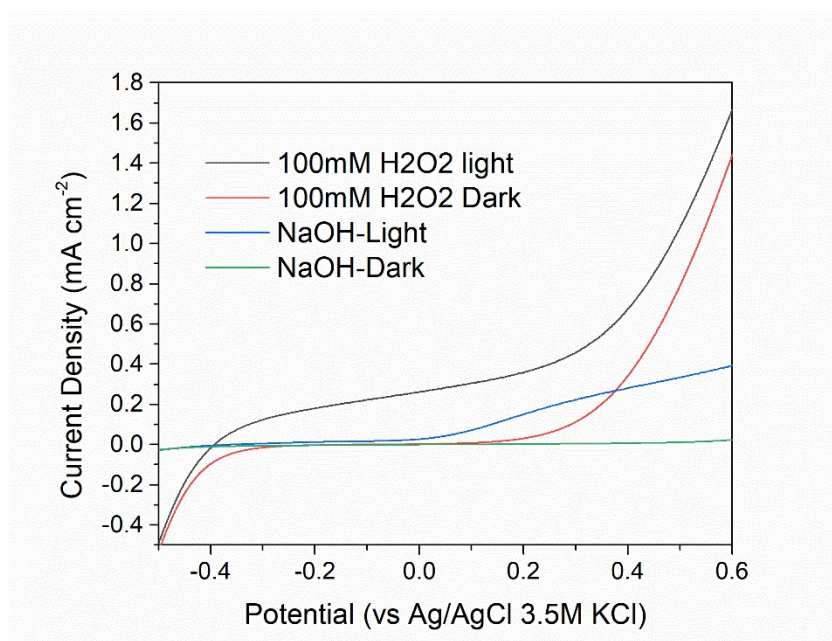

**Fig. S6.** Linear sweep voltammetry curve of the  $\text{Fe}_2\text{O}_3$  photoanodes in 1M NaOH with 100mM  $\text{H}_2\text{O}_2$  as hole scavenger under  $100 \text{ mW cm}^{-2}$  irradiation.

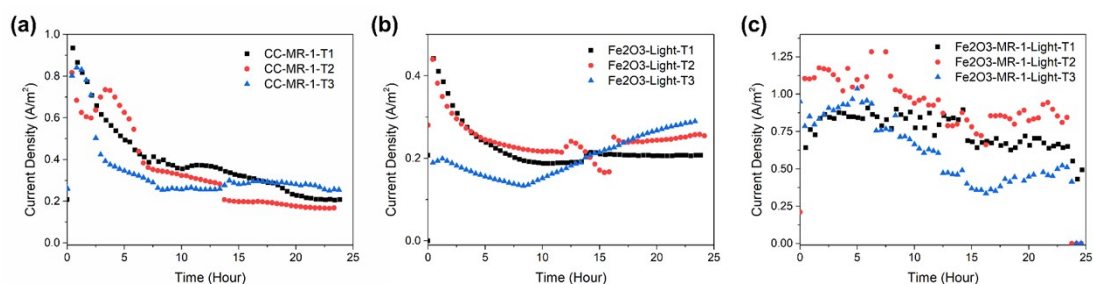

**Fig. S7.** The I-t curve of the 24-hour operation under the external bias of 0.8V of 3 trials.

**Table S1.** The Chemical Oxygen Demand (COD) in mg/L of CC-MR-1, Fe<sub>2</sub>O<sub>3</sub>, Fe<sub>2</sub>O<sub>3</sub>-MR-1 (dark condition), and Fe<sub>2</sub>O<sub>3</sub>-MR-1 (irradiated condition) at T0 (0hr), T12 (12hrs), and T24 (24 hrs) under the external bias of 0.8V.

|                           | CC-MR-1 | Fe <sub>2</sub> O <sub>3</sub> | Fe <sub>2</sub> O <sub>3</sub> -MR-1<br>(Light) | Fe <sub>2</sub> O <sub>3</sub> -MR-1<br>(Dark) |
|---------------------------|---------|--------------------------------|-------------------------------------------------|------------------------------------------------|
| <b>T0 (mg/L)</b>          | 13,954  | 14,049                         | 13,932                                          | 14,910                                         |
| <b>T12 (mg/L)</b>         | 12,654  | 13,159                         | 12,187                                          | 14,143                                         |
| <b>T24 (mg/L)</b>         | 12,143  | 12,579                         | 11,321                                          | 13,532                                         |
| <b>COD removal (mg/L)</b> | 1,811   | 1,470                          | 2,611                                           | 1,378                                          |

**Table S2.** Fitted parameters extracted from the Nyquist plots of all prepared sample electrodes.

|                  | CC-MR-1               | Bare Fe <sub>2</sub> O <sub>3</sub> | Fe <sub>2</sub> O <sub>3</sub> -MR-1 |
|------------------|-----------------------|-------------------------------------|--------------------------------------|
| Rs               | 4.99                  | 143.2                               | 141                                  |
| CPE1-Anode-T     | $1.11 \times 10^{-4}$ | $8.95 \times 10^{-9}$               | $2.95 \times 10^{-8}$                |
| CPE1-Anode-P     | 0.5833                | 1.141                               | 1                                    |
| Ra               | 3.769                 | 79.27                               | 75.88                                |
| CPE1-Cathode-T   | 0.00177               | $5.13 \times 10^{-5}$               | $6.22 \times 10^{-5}$                |
| CPE1- Cathode -P | 0.742                 | 0.526                               | 0.581                                |
| Rc               | 1007                  | 5967                                | 757.1                                |
